# Supplementary material for: Long-Term Assessment of Wild Boar Harvesting and Cattle Removal for Bovine Tuberculosis Control in Free Ranging Populations
Source: PLoS One. 2014 Feb 18;9(2):e88824. doi: 10.1371/journal.pone.0088824 (PMC3928305; doi:10.1371/journal.pone.0088824)
Supplement: Table S1 — MIRU-VNTR results and analysis of the M. bovis and M. caprae isolated from wild boar. a MIRU-VNTR loci with corresponding alias. b MIRU-VNTR types obtained with the four-loci approach including ETR-A, ETR-B, QUB11a and QUB3232. Table is arranged according to the MVtype in ascending order. c Eight out of 99 isolates are not included in the table due to failure in one or more loci or multiple bands in some loci. Grey indicates the MIRU-VNTR profile of the five cattle isolates. The bovine isolate with the SB1685 profile (not included in the table because was only present in cattle) showed the most frequent MV0006 type and the SB0121 spoligotype. (XLSX) [file pone.0088824.s001.xlsx]

## Sheet: Supplementary table 1
Supplementary table 1. MIRU-VNTR results and analysis of the M. bovis and M. caprae isolates from wild boar.
			MIRU-VNTR locia
			ETR-A	ETR-B	QUB11a	3232 short	QU11b	MIRU4	MIRU31	MIRU26	QUB26
MVtype (4 loci)b	N isolatesc	Spoligotype	2165	2461	2163a	3232	2163b	580	3192	2996	4052
MV0001	5	SB0295	6	4	10	7	2	3	3	5	5
MV0001	1	SB1095	6	4	10	7	2	3	3	6	5
MV0006	15	SB0121	5	4	10	7	2	3	3	6	5
MV0006	5	SB0121	5	4	10	7	2	3	3	5	5
MV0006	1	SB0121	5	4	10	7	2	3	3	5/6	5
MV0006	29	SB1095	5	4	10	7	2	3	3	6	5
MV0006	9	SB1336	5	4	10	7	2	3	3	6	5
MV0009	1	SB0120	5	3	10	7	2	3	3	6	5
MV0009	2	SB0121	5	3	10	7	2	3	3	6	5
MV0061	1	SB1336	4	4	10	7	2	3	3	6	5
MV0099	4	SB1192	6	1	10	8	2	3	3	5	5
MV0178	1	SB1192	6	1	10	5	2	3	3	5	5
MV0179	1	SB1192	6	1	10	7	2	3	3	5	5
MV0102	5	SB0294	5	4	9	7	2	3	3	6	5
MV0166	3	SB0121	3	4	10	7	2	3	3	6	5
MV0174	1	SB0121	5	3	10	5	2	3	3	6	5
MV0175	2	SB0140	7	5	9	7	3	3	3	5	4
MV0176	1	SB0415	3	1	6	8	3	3	5	5	2
MV0177	4	SB0415	5	1	6	8	3	3	5	5	2
13 MIRU-VNTR types	91	10 spoligotypes
a MIRU-VNTR loci with corresponding alias.
b MIRU-VNTR types obtained with the four-loci approach including ETR-A, ETR-B, QUB11a and QUB3232. Table is arranged according to the MVtype in ascending order.
c Eight out of 99 isolates are not included in the table due to failure in one or more loci or multiple bands in some loci
Grey colour indicates the MIRU-VNTR profile of the five cattle isolates. The bovine isolate with the SB1685 profile (not included in the table because was only present in cattle) showed the most frequent MV0006 type and the SB0121 spoligotype.
